# Supplementary material for: Experiences and opinions of general practitioners with patient online record access: an online survey in England
Source: HighWire-hosted journal article supplement (doi:10.1136/bmjopen-2023-078158), 2024-01-01
Supplement: bmjopen-2023-078158supp002_data_supplement.pdf [file bmjopen-2023-078158supp002_data_supplement.pdf]

**Supplementary Material 2.** Checklist for Reporting Results of Internet E-Surveys (CHERRIES)

| <i>Item Category</i>                                                          | <i>Checklist item</i>   | <i>Described in the manuscript</i> | <i>Cited from the manuscript</i>                                                                                                                                                                                                                                                                                                                                                                                                                                                                                                   |
|-------------------------------------------------------------------------------|-------------------------|------------------------------------|------------------------------------------------------------------------------------------------------------------------------------------------------------------------------------------------------------------------------------------------------------------------------------------------------------------------------------------------------------------------------------------------------------------------------------------------------------------------------------------------------------------------------------|
| <b>Design</b>                                                                 | Describe survey design  | Yes                                | Subsection 'Survey instrument' in section 'Methods'.                                                                                                                                                                                                                                                                                                                                                                                                                                                                               |
| <b>IRB (Institutional Review Board) approval and informed consent process</b> | IRB approval            | Yes                                | "Ethical approval for the study was obtained from Beth Israel Deaconess Medical Center, Harvard Medical School (Protocol # 2021P000626)."                                                                                                                                                                                                                                                                                                                                                                                          |
|                                                                               | Informed consent        | Yes                                | "All invited GPs were assured that their identities would not be disclosed to investigators, and participants gave informed consent before taking part in the survey. "                                                                                                                                                                                                                                                                                                                                                            |
|                                                                               | Data protection         | Yes                                | "The survey platform <a href="http://www.doctors.net.uk">www.doctors.net.uk</a> which operates on a secure platform which ensures that personal data is numerically stored and fully anonymous (i.e., not linked to the participants' responses). All personal data such as email addresses were removed from respondents' ID before the transfer of the data to the research team. <a href="http://www.doctors.net.uk">www.doctors.net.uk</a> meets the requirements of the EU Law on General Data Protection Regulation (GDPR)." |
| <b>Development and pre-testing</b>                                            | Development and testing | Yes                                | "The study team adapted a Survey instrument originally developed to explore US primary care physicians' views and experiences with open notes.[10] We modified and shortened the survey in consultation with GPs in England and piloted the                                                                                                                                                                                                                                                                                        |

|                                                                                             |                                  |      |                                                                                                                                                                                                                                                                                                                                                                                                                                                                                                                                                                                                                       |
|---------------------------------------------------------------------------------------------|----------------------------------|------|-----------------------------------------------------------------------------------------------------------------------------------------------------------------------------------------------------------------------------------------------------------------------------------------------------------------------------------------------------------------------------------------------------------------------------------------------------------------------------------------------------------------------------------------------------------------------------------------------------------------------|
|                                                                                             |                                  |      | survey with GP colleagues in the UK (n = 5) to ensure face validity.”                                                                                                                                                                                                                                                                                                                                                                                                                                                                                                                                                 |
| <b>Recruitment process and description of the sample having access to the questionnaire</b> | Open survey versus closed survey | Yes  | “Participants in this survey were sampled from GPs in England registered with the clinician marketing service Doctors.net.uk.”                                                                                                                                                                                                                                                                                                                                                                                                                                                                                        |
|                                                                                             | Contact mode                     | Yes  | “Therefore, depending on how GPs consented to receive survey invitations, our study was advertised via email or displayed on the Doctors.net.uk home pages of a sample of GPs between 10th and 31st March 2022. “                                                                                                                                                                                                                                                                                                                                                                                                     |
|                                                                                             | Advertising the survey           | Yes  | “At Doctors.net.uk, a percentage of GPs active within the community consent to being sent survey invitations via email: this percentage differs according to those who are active in any given period. Therefore, depending on how GPs consented to receive survey invitations, our study was advertised via email or displayed on the Doctors.net.uk home pages of a sample of GPs between 10th and 31st March 2022. Doctors.net.uk invited 720 GPs by email and also by invitations embedded in their Doctors.net.uk homepages; a further 2,072 GPs were invited to participate only via links on their homepages.” |
| <b>Survey administration</b>                                                                | Web/E-mail                       | Both | “Participants in this survey were sampled from GPs in England registered with the clinician marketing service Doctors.net.uk. This is the largest professional network and online information service of UK doctors with 248,326 doctors out of a total of 355,250 UK doctors (70%) registered with it. Approximately, 21,250 GPs out of a total of 36,752 registered and working in the UK (58%) are active in                                                                                                                                                                                                       |

|  |         |     |                                                                                                                                                                                                                                                                                                                                                                                                                                                                                                                                                                                                                                                                                                                                                                                                                                                                                                                                                                                                                                                                                                                                                                                                                                          |
|--|---------|-----|------------------------------------------------------------------------------------------------------------------------------------------------------------------------------------------------------------------------------------------------------------------------------------------------------------------------------------------------------------------------------------------------------------------------------------------------------------------------------------------------------------------------------------------------------------------------------------------------------------------------------------------------------------------------------------------------------------------------------------------------------------------------------------------------------------------------------------------------------------------------------------------------------------------------------------------------------------------------------------------------------------------------------------------------------------------------------------------------------------------------------------------------------------------------------------------------------------------------------------------|
|  |         |     | <p>the community in any 90-day period. Ethical approval for the study was obtained from Beth Israel Deaconess Medical Center, Harvard Medical School (Protocol # 2021P000626). At Doctors.net.uk, a percentage of GPs active within the community consent to being sent survey invitations via email: this percentage differs according to those who are active in any given period. Therefore, depending on how GPs consented to receive survey invitations, our study was advertised via email or displayed on the Doctors.net.uk home pages of a sample of GPs between 10th and 31st March 2022. We asked Doctors.net.uk to invite a random sample stratified by gender and age using demographic information about currently registered GPs working in England provided by the General Medical Council (GMC) the GMC Data Explorer (<a href="https://data.gmc-uk.org/gmcdata/home/#/">https://data.gmc-uk.org/gmcdata/home/#/</a>). We have obtained samples from Doctors.net.uk in previous studies using similar methods [19]. Doctors.net.uk invited 720 GPs by email and also by invitations embedded in their Doctors.net.uk homepages; a further 2,072 GPs were invited to participate only via links on their homepages.”</p> |
|  | Context | Yes | <p>“This is the largest professional network and online information service of UK doctors with 248,326 doctors out of a total of 355,250 UK doctors (70%) registered with it. Approximately, 21,250 GPs out of a total of 36,752 registered and working in the UK (58%) are active in the community in any 90-day period.”</p>                                                                                                                                                                                                                                                                                                                                                                                                                                                                                                                                                                                                                                                                                                                                                                                                                                                                                                           |

|  |                                          |           |                                                                                                                                                                                                                  |
|--|------------------------------------------|-----------|------------------------------------------------------------------------------------------------------------------------------------------------------------------------------------------------------------------|
|  | Mandatory/voluntary                      | Voluntary | "All invited GPs were assured that their identities would not be disclosed to investigators and that participation was voluntary. All participants gave informed consent before taking part in the survey."      |
|  | Incentives                               | Yes       | "A small incentive worth £7.50 (\$8.80, €8.83) in exchangeable shopping vouchers was provided on completion, and participants were required to respond to every closed ended question to complete the survey."   |
|  | Time/Date                                | Yes       | "Therefore, depending on how GPs consented to receive survey invitations, our study was advertised via email or displayed on the Doctors.net.uk home pages of a sample of GPs between 10th and 31st March 2022." |
|  | Randomization of items or questionnaires | No        |                                                                                                                                                                                                                  |
|  | Adaptive questioning                     | No        |                                                                                                                                                                                                                  |
|  | Number of Items                          | Yes       | "The survey encompassed 34 items was timed to take around 5 minutes to complete."                                                                                                                                |
|  | Number of screens (pages)                | No        |                                                                                                                                                                                                                  |
|  | Completeness check                       | Yes       | "A small incentive worth £7.50 (\$8.80, €8.83) in exchangeable shopping vouchers was provided on completion, and participants were required to respond                                                           |

|                                                             |                                                                                                           |     |                                                                                                                                                                                                                                                                                 |
|-------------------------------------------------------------|-----------------------------------------------------------------------------------------------------------|-----|---------------------------------------------------------------------------------------------------------------------------------------------------------------------------------------------------------------------------------------------------------------------------------|
|                                                             |                                                                                                           |     | to every closed ended question to complete the survey."                                                                                                                                                                                                                         |
|                                                             | Review step                                                                                               | No  |                                                                                                                                                                                                                                                                                 |
| <b>Response rates</b>                                       | Unique site visitor                                                                                       | No  |                                                                                                                                                                                                                                                                                 |
|                                                             | View rate (Ratio of unique survey visitors/unique site visitors)                                          | Yes | "Of the 720 who received email and homepage invitations, 601 opened the email invite, and 102 clicked on the survey link with 63 completing the survey (response rate: 63/720, 9%); the remainder (337) accessed and completed the survey via their homepage (337/2072, 16%). " |
|                                                             | Participation rate (Ratio of unique visitors who agreed to participate/unique first survey page visitors) | Yes | "Of the 720 who received email and homepage invitations, 601 opened the email invite, and 102 clicked on the survey link with 63 completing the survey (response rate: 63/720, 9%); the remainder (337) accessed and completed the survey via their homepage (337/2072, 16%)."  |
|                                                             | Completion rate (Ratio of users who finished the survey/users who agreed to participate)                  | Yes | "Of the 720 who received email and homepage invitations, 601 opened the email invite, and 102 clicked on the survey link with 63 completing the survey (response rate: 63/720, 9%); the remainder (337) accessed and completed the survey via their homepage (337/2072, 16%)."  |
| <b>Preventing multiple entries from the same individual</b> | Cookies used                                                                                              | No  |                                                                                                                                                                                                                                                                                 |
|                                                             | IP check                                                                                                  | No  |                                                                                                                                                                                                                                                                                 |

|          |                                                     |     |                                                                                                     |
|----------|-----------------------------------------------------|-----|-----------------------------------------------------------------------------------------------------|
|          | Log file analysis                                   | No  |                                                                                                     |
|          | Registration                                        | No  |                                                                                                     |
| Analysis | Handling of incomplete questionnaires               | Yes | “... participants were required to respond to every closed ended question to complete the survey. “ |
|          | Questionnaires submitted with an atypical timestamp | No  |                                                                                                     |
|          | Statistical correction                              | No  |                                                                                                     |
